# Supplementary material for: Microorganism-Based Larval Diets Affect Mosquito Development, Size and Nutritional Reserves in the Yellow Fever Mosquito Aedes aegypti (Diptera: Culicidae)
Source: PubMed Central journal article supplement (PMC6465640; doi:10.3389/fphys.2019.00152), 2019-04-09
Supplement: Presentation_1.pdf [file Presentation_1.pdf]

## Supplementary Material

**Spreadsheet 1.** Biological life parameters of *Aedes aegypti* raised on microorganism-based diets (Spreadsheet complete). Excel file.

**Supplementary Table 1.** Average pupation time in days of *Aedes aegypti* larvae reared with microorganisms. Differences were analyzed with Log-rank and Wilcoxon.

| <b>Diet</b>                     | <b><math>n_i</math></b> | <b>Pupae (<math>n</math>)</b> | <b>Mean <math>\pm</math> SEM</b> | <b>Median</b> | <b>Pupation (%)</b> | <b><math>p</math> value</b> |
|---------------------------------|-------------------------|-------------------------------|----------------------------------|---------------|---------------------|-----------------------------|
| Tetramin®                       | 150                     | 150                           | 5.3 $\pm$ 0.04                   | 5             | 100                 | -                           |
| <i>Pseudozyma</i> sp            | 150                     | 143                           | 6.5 $\pm$ 0.1                    | 6             | 95                  | $p < 0.0001$                |
| <i>Saccharomyces cerevisiae</i> | 150                     | 150                           | 8.1 $\pm$ 0.05                   | 8             | 100                 | $p < 0.0001$                |
| <i>Escherichia coli</i>         | 300                     | 114                           | 16.7 $\pm$ 0.5                   | 15            | 38                  | $p < 0.0001$                |
| <i>Serratia marcescens</i>      | 400                     | 4                             | 42 $\pm$ 3                       | 42            | 1                   | NA                          |
| <i>Bacillus</i> sp              | 150                     | 2                             | 34.0 $\pm$ 0.0                   | 34            | 1                   | NA                          |
| <i>Asaia</i> sp                 | 300                     | 44                            | 10.5 $\pm$ 0.3                   | 10            | 15                  | $p < 0.0001$                |
| <i>Staphylococcus aureus</i>    | 150                     | 33                            | 24 $\pm$ 1                       | 22            | 22                  | $p < 0.0001$                |
| <i>Ochrobactrum intermedium</i> | 150                     | 9                             | 28 $\pm$ 3                       | 28            | 6                   | $p < 0.0001$                |
| <i>Chlorella</i> sp             | 250                     | 28                            | 61 $\pm$ 2                       | 61            | 11                  | $p < 0.0001$                |
| <i>Arthrospira platensis</i>    | 400                     | 30                            | 35 $\pm$ 1                       | 35            | 8                   | $p < 0.0001$                |

$n_i$ : Number of individuals used

NA: Not available.

**Supplementary Table 2.** Average metamorphosis time in days of *Aedes aegypti* reared with microorganisms in larval stages. Differences were analyzed with Log-rank and Wilcoxon.

| <b>Diet</b>                     | <b>Adults (n)</b> | <b>Mean ± SEM</b> | <b>Median</b> | <b>Metamorphosis(%)</b> | <b>p value</b>    |
|---------------------------------|-------------------|-------------------|---------------|-------------------------|-------------------|
| Tetramin®                       | 149               | 2.1 ± 0.02        | 2             | 99                      | -                 |
| <i>Pseudozyma</i> sp            | 129               | 2.4 ± 0.05        | 2             | 90                      | <i>p</i> < 0.0001 |
| <i>Saccharomyces cerevisiae</i> | 149               | 2.5 ± 0.04        | 3             | 99                      | <i>p</i> < 0.0001 |
| <i>Escherichia coli</i>         | 87                | 2.3 ± 0.1         | 2             | 76                      | <i>p</i> 0.0003   |
| <i>Serratia marcescens</i>      | 2                 | 2.5 ± 0.5         | 3             | 50                      | NA                |
| <i>Bacillus</i> sp              | 2                 | 2.0 ± 0.0         | 2             | 100                     | NA                |
| <i>Asaia</i> sp                 | 41                | 2.0 ± 0.04        | 2             | 93                      | <i>p</i> 0.6804   |
| <i>Staphylococcus aureus</i>    | 16                | 2.4 ± 2.0         | 2             | 48                      | <i>p</i> < 0.0001 |
| <i>Ochrobactrum intermedium</i> | 8                 | 2.0 ± 0.0         | 2             | 89                      | <i>p</i> 0.3652   |
| <i>Chlorella</i> sp             | 27                | 1.9 ± 0.07        | 2             | 96                      | <i>p</i> 0.0978   |
| <i>Arthrospira platensis</i>    | 28                | 1.9 ± 0.09        | 2             | 93                      | <i>p</i> 0.1042   |

NA: Not available.

**Supplementary Table 3.** Average emergence time in days of *Aedes aegypti* reared with microorganisms in larval stages. Differences were analyzed with Log-rank and Wilcoxon.

| <b>Diet</b>                     | <b>Adults (n)</b> | <b>Mean ± SEM</b> | <b>Median</b> | <b>Emergence (%)</b> | <b>p value</b>    |
|---------------------------------|-------------------|-------------------|---------------|----------------------|-------------------|
| Tetramin®                       | 149               | 7.4 ± 0.05        | 7             | 99                   | -                 |
| <i>Pseudozyma</i> sp            | 129               | 8.9 ± 0.1         | 9             | 86                   | <i>p</i> < 0.0001 |
| <i>Saccharomyces cerevisiae</i> | 149               | 10.6 ± 0.05       | 11            | 99                   | <i>p</i> < 0.0001 |
| <i>Escherichia coli</i>         | 87                | 18.0 ± 0.4        | 17            | 29                   | <i>p</i> < 0.0001 |
| <i>Serratia marcescens</i>      | 1                 | 44 ± 4            | 45            | 0                    | NA                |
| <i>Bacillus</i> sp              | 2                 | 36.0 ± 0.0        | 36            | 1                    | NA                |
| <i>Asaia</i> sp                 | 41                | 12.6 ± 0.3        | 12            | 14                   | <i>p</i> < 0.0001 |
| <i>Staphylococcus aureus</i>    | 16                | 25 ± 2            | 24            | 11                   | <i>p</i> < 0.0001 |
| <i>Ochrobactrum intermedium</i> | 8                 | 28 ± 3            | 29            | 5                    | <i>p</i> < 0.0001 |
| <i>Chlorella</i> sp             | 27                | 63 ± 2            | 63            | 11                   | <i>p</i> < 0.0001 |
| <i>Arthrospira platensis</i>    | 28                | 37 ± 1            | 37            | 7                    | <i>p</i> < 0.0001 |

NA: Not available.

**Supplementary Table 4.** Average mean survival in days of *Aedes aegypti* reared with microorganisms in larval stage. Differences were analyzed with Log-rank and Wilcoxon.

| <b>Diet</b>                     | <b>Adults (n)</b> | <b>Mean ± SEM</b> | <b>Median</b> | <b>p value</b> |
|---------------------------------|-------------------|-------------------|---------------|----------------|
| Tetramin®                       | 149               | 8.9 ± 0.1         | 9             | -              |
| <i>Pseudozyma</i> sp            | 129               | 4.7 ± 0.1         | 5             | $p < 0.0001$   |
| <i>Saccharomyces cerevisiae</i> | 149               | 4.8 ± 0.1         | 4             | $p < 0.0001$   |
| <i>Escherichia coli</i>         | 87                | 6.2 ± 0.3         | 6             | $p < 0.0001$   |
| <i>Serratia marcescens</i>      | 2                 | 3.0 ± 0.0         | 3             | NA             |
| <i>Bacillus</i> sp              | 2                 | 2.0 ± 0.0         | 2             | NA             |
| <i>Asaia</i> sp                 | 41                | 5.6 ± 0.2         | 6             | $p < 0.0001$   |
| <i>Staphylococcus aureus</i>    | 16                | 2.3 ± 0.3         | 2             | $p < 0.0001$   |
| <i>Ochrobactrum intermedium</i> | 8                 | 2.5 ± 0.2         | 3             | $p < 0.0001$   |
| <i>Chlorella</i> sp             | 27                | 3.4 ± 0.1         | 3             | $p < 0.0001$   |
| <i>Arthrospira platensis</i>    | 28                | 4.0 ± 0.3         | 4             | $p < 0.0001$   |

NA: Not available.

**Supplementary Table 5.** Full lifespan in days of *Aedes aegypti* reared with microorganisms in larval stage. Differences were analyzed with Log-rank and Wilcoxon.

| <b>Diet</b>                     | <b>Adults (<i>n</i>)</b> | <b>Mean ± SEM</b> | <b>Median</b> | <b><i>p</i> value</b> |
|---------------------------------|--------------------------|-------------------|---------------|-----------------------|
| Tetramin®                       | 149                      | 16.3 ± 0.1        | 16            | -                     |
| <i>Pseudozyma</i> sp            | 129                      | 13.7 ± 0.1        | 14            | <i>p</i> < 0.0001     |
| <i>Saccharomyces cerevisiae</i> | 149                      | 15.1 ± 0.1        | 15            | <i>p</i> < 0.0001     |
| <i>Escherichia coli</i>         | 87                       | 24.2 ± 0.5        | 24            | <i>p</i> < 0.0001     |
| <i>Serratia marcescens</i>      | 2                        | 46.5 ± 0.0        | 47            | NA                    |
| <i>Bacillus</i> sp              | 2                        | 38.0 ± 0.0        | 38            | NA                    |
| <i>Asaia</i> sp                 | 41                       | 18.2 ± 0.2        | 18            | <i>p</i> < 0.0001     |
| <i>Staphylococcus aureus</i>    | 16                       | 26 ± 2            | 25            | <i>p</i> < 0.0001     |
| <i>Ochrobactrum intermedium</i> | 8                        | 31 ± 3            | 33            | <i>p</i> < 0.0001     |
| <i>Chlorella</i> sp             | 27                       | 64 ± 3            | 66            | <i>p</i> < 0.0001     |
| <i>Arthrospira platensis</i>    | 28                       | 39 ± 1            | 41            | <i>p</i> < 0.0001     |

NA: Not available.

**Supplementary Table 6.** Sex ratio of emerged adults. Differences were analyzed with Fisher test.

| <b>Diet</b>                     | <b>Males n ♂</b> | <b>Females n ♀</b> | <b>Sex Ratio</b> | <b>p value</b> |
|---------------------------------|------------------|--------------------|------------------|----------------|
| Tetramin®                       | 61               | 88                 | 69               | -              |
| <i>Pseudozyma</i> sp            | 83               | 46                 | 180              | 0.0001         |
| <i>Saccharomyces cerevisiae</i> | 87               | 62                 | 140              | 0.0037         |
| <i>Escherichia coli</i>         | 58               | 29                 | 200              | 0.0002         |
| <i>Serratia marcescens</i>      | 2                | 0                  | NA               | NA             |
| <i>Bacillus</i> sp              | 2                | 0                  | NA               | NA             |
| <i>Asaia</i> sp                 | 25               | 16                 | 156              | 0.0328         |
| <i>Staphylococcus aureus</i>    | 11               | 5                  | 220              | 0.0604         |
| <i>Ochrobactrum intermedium</i> | 7                | 1                  | 700              | 0.0215         |
| <i>Chlorella</i> sp             | 21               | 6                  | 350              | 0.0006         |
| <i>Arthrospira platensis</i>    | 19               | 9                  | 211              | 0.0123         |

NA: Not available.

**Supplementary Table 7.** Raw data used in geometric morphometric analysis

| Diet                            | Gender | Individuals | Wings analyzed (R+L) |
|---------------------------------|--------|-------------|----------------------|
| <i>Asaia</i> sp.                | F      | 16          | 32                   |
| <i>Asaia</i> sp.                | M      | 21          | 42                   |
| <i>Escherichia coli</i>         | F      | 20          | 40                   |
| <i>Escherichia coli</i>         | M      | 30          | 60                   |
| Tetramin ® Feed                 | F      | 17          | 34                   |
| Tetramin ® Feed                 | M      | 22          | 44                   |
| <i>Saccharomyces cerevisiae</i> | F      | 30          | 60                   |
| <i>Saccharomyces cerevisiae</i> | M      | 30          | 60                   |
| <i>Pseudozyma</i> sp.           | F      | 29          | 58                   |
| <i>Pseudozyma</i> sp.           | M      | 30          | 60                   |
| Tetramin ® Feed                 | F      | 23          | 46                   |
| Tetramin ® Feed                 | M      | 30          | 60                   |

**Supplementary Table 8.** Scores of sample distribution test.

| Non Normal Distribution      |             | Normal Distribution |        |        |        |
|------------------------------|-------------|---------------------|--------|--------|--------|
| M                            |             | F                   |        | M      |        |
| E                            | D           | E                   | D      | E      | D      |
| <b><i>S. cerevisiae</i></b>  |             |                     |        |        |        |
| 0.000004456                  | 0.000001311 | 0.8169              | 0.9916 | -      | -      |
| <b>Tetramin ®</b>            |             |                     |        |        |        |
| 0.03551                      | -           | 0.122               | 0.1387 | -      | 0.0862 |
| <b><i>Pseudozyma</i> sp.</b> |             |                     |        |        |        |
| 0.0005214                    | 0.0001664   | 0.5358              | 0.479  | -      | -      |
| <b>Tetramin ®</b>            |             |                     |        |        |        |
| 0.005014                     | 0.01314     | 0.6853              | 0.5239 | -      | -      |
| <b><i>Asaia</i> sp.</b>      |             |                     |        |        |        |
| 0.02106                      | 0.01062     | 0.4306              | 0.4903 | -      | -      |
| <b><i>E. coli</i></b>        |             |                     |        |        |        |
| -                            | -           | 0.2646              | 0.7693 | 0.3918 | 0.6024 |



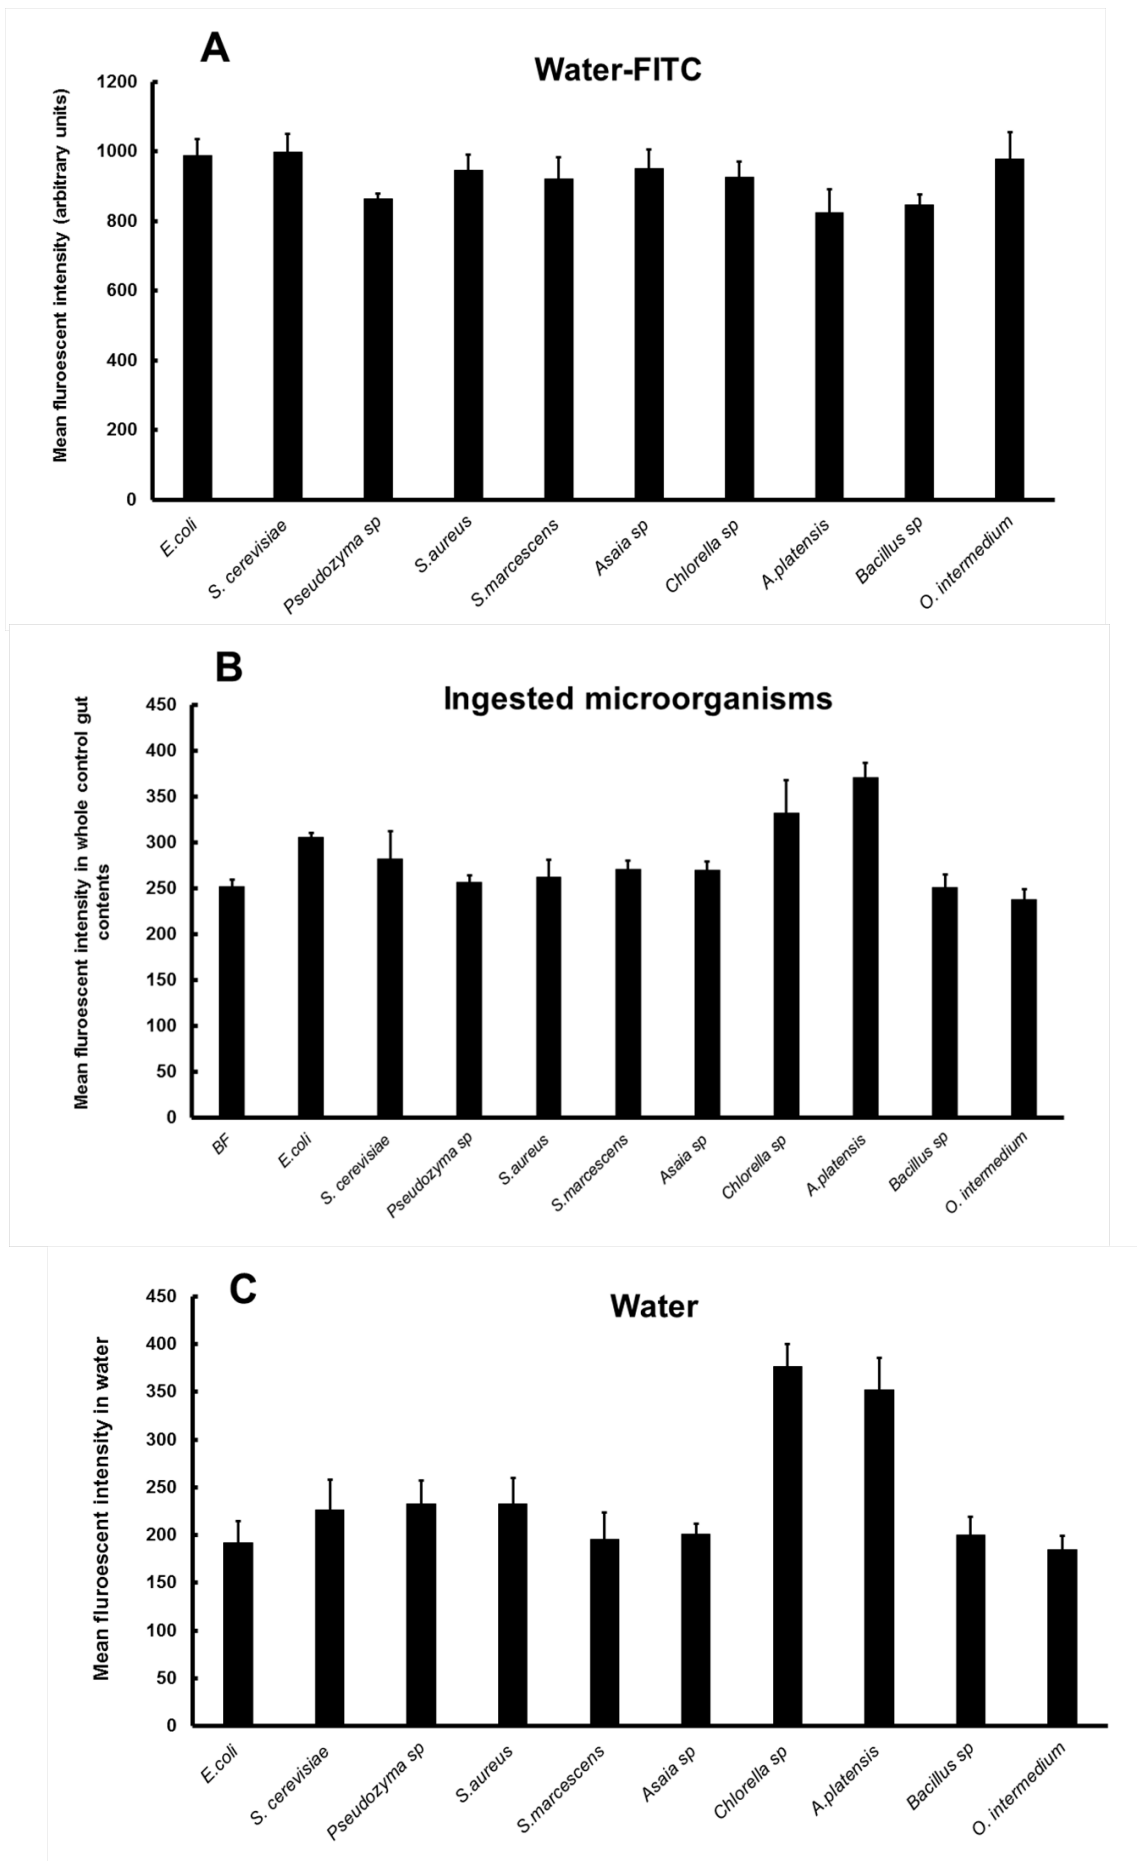

**Figure S1.** Mean fluorescent intensity of larval guts after 2 hours in **(A)** water with FITC-labeled microorganisms, **(B)** water with non FITC-labeled microorganisms (controls) and **(C)** standard rearing water.

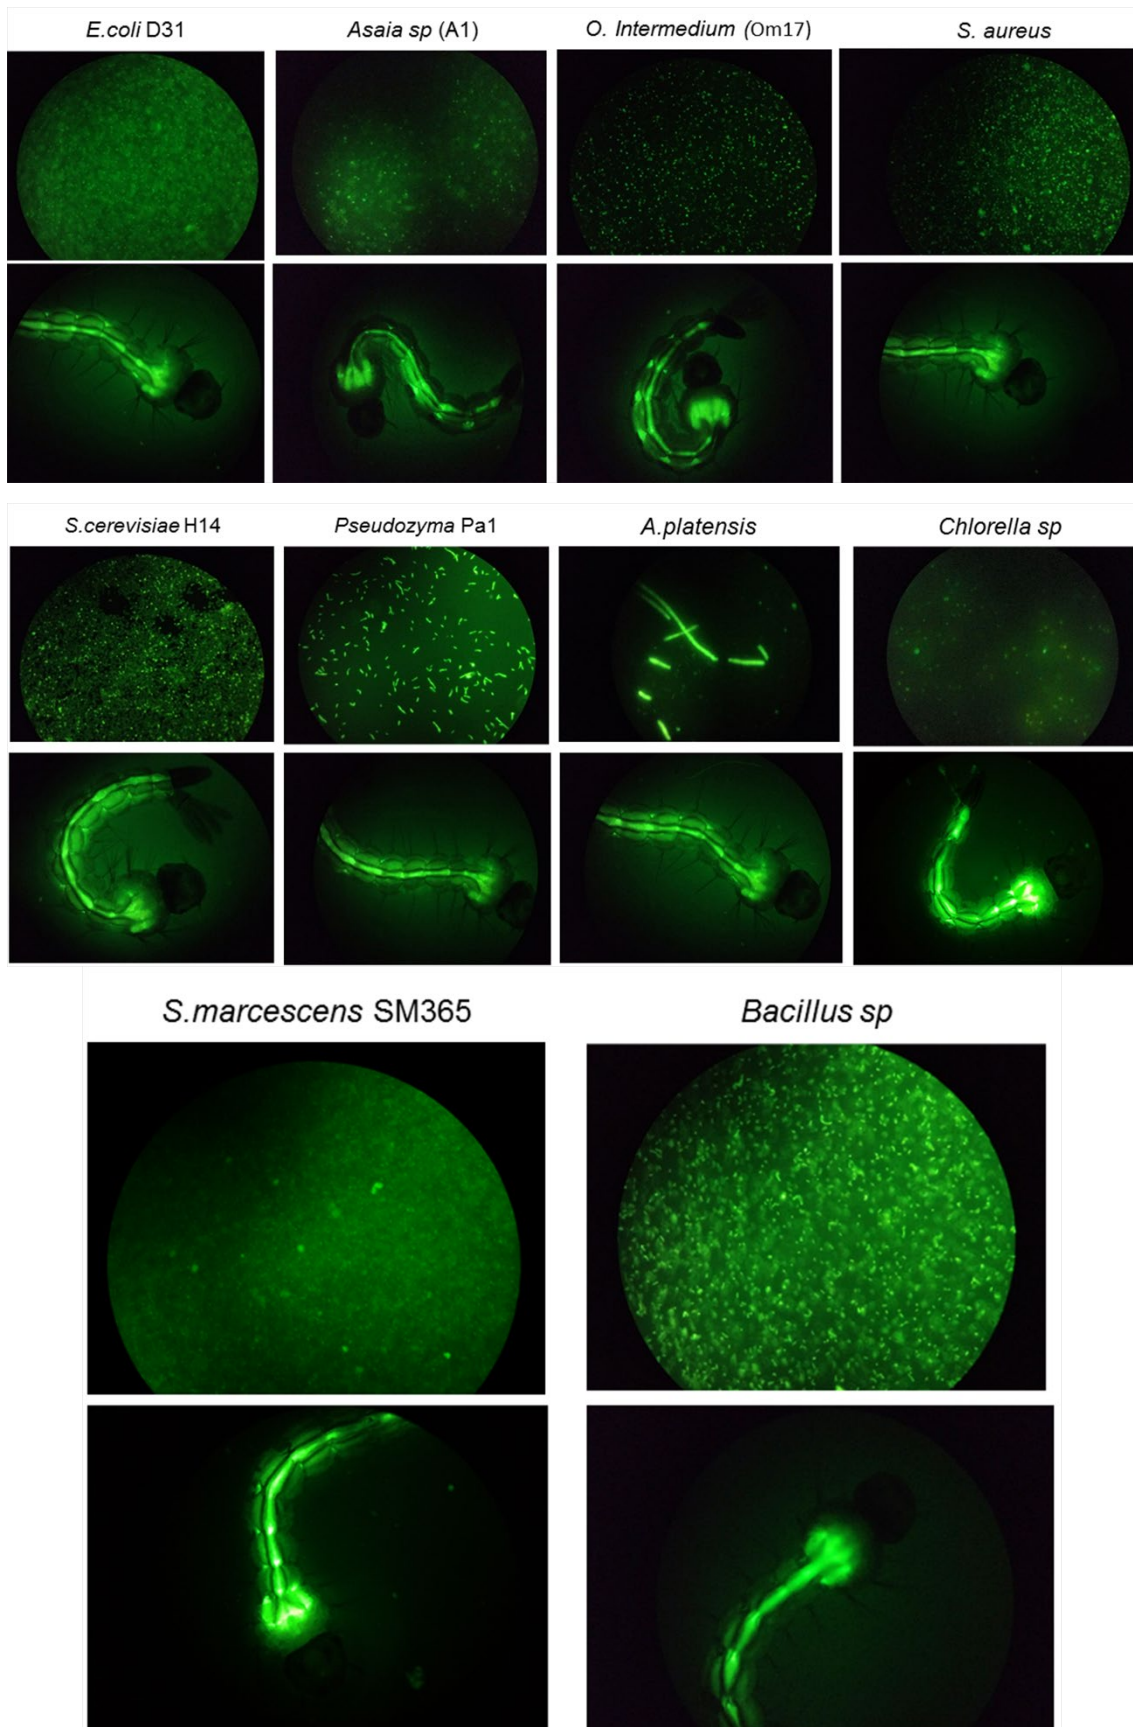

**Figure S2.** *Aedes aegypti* larvae consuming different microorganisms. Fluorescent images of each microorganism strain after FITC-labeling and individual larvae 2 hours after placing FITC-labeled microbial cells into rearing water. Note that fluorescent tracer is visible in the intestine of each larva 2 hours after exposure.
