# Supplementary material for: Microorganism-Based Larval Diets Affect Mosquito Development, Size and Nutritional Reserves in the Yellow Fever Mosquito Aedes aegypti (Diptera: Culicidae)
Source: Front Physiol. 2019 Apr 9;10:152. doi: 10.3389/fphys.2019.00152 (PMC6465640; doi:10.3389/fphys.2019.00152)
Supplement: Supplementary file 2 [file Data_Sheet_1.xlsx]

## Sheet: DEVELOPMENT  DATA
Diet	Concentration	individual larva	pupa (days)	dead pupa	pupa- adult (days)	larva-adult (days)	dead adult (days)	full life span (days)	Sex
E. coli	800	1	11	0	2	13	8	21	F
E. coli	800	2	12	0	2	14	3	17	F
E. coli	800	3	13	0	3	16	2	18	M
E. coli	800	4	13	0	2	15	9	24	M
E. coli	800	5	13	0	2	15	3	18	M
E. coli	800	6	14	0	3	17	3	20	F
E. coli	800	7	14	0	2	16	5	21	M
E. coli	800	8	15	0	2	17	3	20	M
E. coli	800	9	15	2	0	0	0	0	0
E. coli	800	10	15	0	2	17	8	25	M
E. coli	800	11	15	0	2	17	9	26	M
E. coli	800	12	16	0	2	18	8	26	M
E. coli	800	13	17	0	2	19	9	28	F
E. coli	800	14	16	0	2	18	7	25	M
E. coli	800	15	16	1	0	16	0	0	0
E. coli	800	16	18	0	2	20	2	22	M
E. coli	800	17	21	0	2	23	1	24	M
E. coli	800	18	11	0	2	13	9	22	M
E. coli	800	19	11	0	2	13	11	24	M
E. coli	800	20	11	0	2	13	8	21	F
E. coli	800	21	12	0	2	14	3	17	M
E. coli	800	22	12	0	2	14	7	21	M
E. coli	800	23	13	0	2	15	9	24	M
E. coli	800	24	13	0	2	15	12	27	M
E. coli	800	25	14	0	2	16	4	20	F
E. coli	800	26	14	0	2	16	7	23	M
E. coli	800	27	14	0	3	17	9	26	M
E. coli	800	28	15	0	3	18	2	20	M
E. coli	800	29	15	0	2	17	2	19	F
E. coli	800	30	15	0	2	17	8	25	M
E. coli	800	31	15	0	2	17	10	27	M
E. coli	800	32	15	0	3	18	2	20	M
E. coli	800	33	16	1	0	0	0	0	0
E. coli	800	34	16	1	0	0	0	0	0
E. coli	800	35	16	0	3	19	7	26	F
E. coli	800	36	16	0	2	18	0	18	M
E. coli	800	37	16	0	2	18	6	24	M
E. coli	800	38	17	0	2	19	7	26	M
E. coli	800	39	18	3	0	18	0	18	0
E. coli	800	40	18	1	0	0	0	0	0
E. coli	800	41	19	1	0	0	0	0	0
E. coli	800	42	21	0	2	23	6	29	M
E. coli	800	43	24	2	0	24	0	0	0
E. coli	800	44	31	1	0	31	0	0	0
E. coli	800	45	9	1	0	9	0	9	0
E. coli	800	46	9	0	2	11	7	18	F
E. coli	800	47	11	2	0	0	0	0	0
E. coli	800	48	11	0	3	14	4	18	F
E. coli	800	49	11	0	3	14	4	18	F
E. coli	800	50	11	0	2	13	10	23	M
E. coli	800	51	11	0	2	13	11	24	M
E. coli	800	52	11	1	0	0	0	0	0
E. coli	800	53	11	0	3	14	11	25	M
E. coli	800	54	12	0	3	15	4	19	F
E. coli	800	55	12	0	3	15	8	23	M
E. coli	800	56	12	0	3	15	6	21	F
E. coli	800	57	12	0	3	15	0	15	0
E. coli	800	58	13	0	2	15	4	19	M
E. coli	800	59	13	0	2	15	4	19	M
E. coli	800	60	13	0	2	15	8	23	M
E. coli	800	61	13	1	0	0	0	0	0
E. coli	800	62	14	0	2	16	3	19	F
E. coli	800	63	14	0	3	17	10	27	M
E. coli	800	64	14	0	2	16	3	19	F
E. coli	800	65	14	0	2	16	9	25	M
E. coli	800	66	15	0	2	17	3	20	F
E. coli	800	67	15	0	2	17	7	24	M
E. coli	800	68	15	0	3	18	3	21	F
E. coli	800	69	15	0	2	17	8	25	M
E. coli	800	70	16	0	3	19	4	23	F
E. coli	800	71	16	0	2	18	10	28	M
E. coli	800	72	16	0	2	18	2	20	F
E. coli	800	73	17	0	2	19	9	28	F
E. coli	800	74	17	0	2	19	8	27	M
E. coli	800	75	19	1	0	0	0	0	0
E. coli	800	76	29	0	2	31	3	34	M
E. coli	800	77	12	0	2	14	13	27	M
E. coli	800	78	12	0	2	14	13	27	M
E. coli	800	79	12	0	3	15	4	19	M
E. coli	800	80	13	0	2	15	12	27	M
E. coli	800	81	14	0	2	16	6	22	M
E. coli	800	82	15	0	2	17	11	28	M
E. coli	800	83	16	2	0	0	0	0	0
E. coli	800	84	16	2	0	0	0	0	0
E. coli	800	85	17	0	2	19	8	27	M
E. coli	800	86	18	0	2	20	3	23	M
E. coli	800	87	18	1	0	18	0	0	0
E. coli	800	88	18	0	2	20	3	23	F
E. coli	800	89	18	0	2	20	7	27	M
E. coli	800	90	18	0	3	21	6	27	M
E. coli	800	91	18	0	3	21	15	36	M
E. coli	800	92	18	1	0	18	0	0	0
E. coli	800	93	19	0	2	21	6	27	M
E. coli	800	94	21	0	3	24	5	29	F
E. coli	800	95	23	0	2	25	7	32	M
E. coli	800	96	24	3	0	24	0	0	0
E. coli	800	97	24	0	0	24	0	0	0
E. coli	800	98	29	1	0	29	0	0	0
E. coli	800	99	29	1	0	29	0	0	0
E. coli	800	100	36	0	2	38	5	43	M
E. coli	800	101	17	0	2	19	4	23	M
E. coli	800	102	17	0	2	19	3	22	M
E. coli	800	103	18	0	2	20	6	26	F
E. coli	800	104	19	0	3	22	5	27	F
E. coli	800	105	19	1	0	19	0	0	0
E. coli	800	106	20	0	3	23	3	26	F
E. coli	800	107	23	0	3	26	3	29	F
E. coli	800	108	24	0	2	26	7	33	F
E. coli	800	109	24	0	2	26	3	29	F
E. coli	800	110	24	0	3	27	6	33	M
E. coli	800	111	29	2	0	29	0	0	0
E. coli	800	112	31	0	0	31	0	0	0
E. coli	800	113	35	2	0	35	0	35	0
E. coli	800	114	24	0	2	26	3	29	F
Pseudo	800	1	5	0	3	8	7	15	M
Pseudo	800	2	5	0	2	7	10	17	M
Pseudo	800	3	5	0	3	8	8	16	M
Pseudo	800	4	5	0	3	8	8	16	M
Pseudo	800	5	5	0	3	8	8	16	M
Pseudo	800	6	5	0	3	8	8	16	M
Pseudo	800	7	5	0	3	8	8	16	M
Pseudo	800	8	5	0	2	7	9	16	M
Pseudo	800	9	5	0	3	8	7	15	M
Pseudo	800	10	6	0	2	8	4	12	M
Pseudo	800	11	6	0	2	8	4	12	F
Pseudo	800	12	6	0	2	8	8	16	M
Pseudo	800	13	6	0	2	8	6	14	M
Pseudo	800	14	6	0	2	8	8	16	M
Pseudo	800	15	6	0	3	9	5	14	M
Pseudo	800	16	6	0	2	8	6	14	M
Pseudo	800	17	6	0	2	8	6	14	M
Pseudo	800	18	6	0	2	8	7	15	M
Pseudo	800	19	6	0	2	8	7	15	M
Pseudo	800	20	6	0	3	9	3	12	F
Pseudo	800	21	6	0	3	9	5	14	F
Pseudo	800	22	6	0	2	8	6	14	M
Pseudo	800	23	6	0	3	9	0	9	F
Pseudo	800	24	6	0	2	8	7	15	M
Pseudo	800	25	6	0	3	9	3	12	F
Pseudo	800	26	6	0	3	9	4	13	F
Pseudo	800	27	6	0	2	8	7	15	M
Pseudo	800	28	6	0	3	9	3	12	F
Pseudo	800	29	6	0	2	8	7	15	M
Pseudo	800	30	6	0	2	8	5	13	M
Pseudo	800	31	6	0	0	0	0	0	0
Pseudo	800	32	6	0	3	9	3	12	F
Pseudo	800	33	6	0	0	0	0	0	0
Pseudo	800	34	7	0	2	9	4	13	F
Pseudo	800	35	7	0	2	9	6	15	M
Pseudo	800	36	7	0	2	9	5	14	M
Pseudo	800	37	7	0	0	0	0	0	0
Pseudo	800	38	8	0	0	0	0	0	0
Pseudo	800	39	8	0	2	10	3	13	F
Pseudo	800	40	8	0	2	10	4	14	F
Pseudo	800	41	8	0	2	10	4	14	F
Pseudo	800	42	9	0	0	0	0	0	0
Pseudo	800	43	9	0	2	11	3	14	M
Pseudo	800	44	11	0	3	14	4	18	F
Pseudo	800	45	5	1	0	0	0	0	0
Pseudo	800	46	5	0	2	7	7	14	M
Pseudo	800	47	5	0	3	8	5	13	M
Pseudo	800	48	5	0	2	7	7	14	M
Pseudo	800	49	5	0	3	8	7	15	M
Pseudo	800	50	5	0	3	8	6	14	M
Pseudo	800	51	5	0	3	8	5	13	M
Pseudo	800	52	5	0	3	8	6	14	M
Pseudo	800	53	5	0	3	8	6	14	M
Pseudo	800	54	5	0	3	8	6	14	M
Pseudo	800	55	6	0	2	8	4	12	F
Pseudo	800	56	6	0	2	8	4	12	F
Pseudo	800	57	6	0	3	9	3	12	F
Pseudo	800	58	6	0	3	9	5	14	M
Pseudo	800	59	6	0	2	8	6	14	M
Pseudo	800	60	6	0	0	0	0	0	0
Pseudo	800	61	6	0	3	9	5	14	M
Pseudo	800	62	6	0	3	9	4	13	M
Pseudo	800	63	6	0	3	9	5	14	M
Pseudo	800	64	6	0	2	8	6	14	M
Pseudo	800	65	6	0	2	8	6	14	M
Pseudo	800	66	6	0	2	8	6	14	M
Pseudo	800	67	6	0	2	8	7	15	M
Pseudo	800	68	6	0	3	9	3	12	F
Pseudo	800	69	6	0	2	8	8	16	M
Pseudo	800	70	6	0	3	9	4	13	M
Pseudo	800	71	6	0	2	8	8	16	M
Pseudo	800	72	6	0	2	8	6	14	M
Pseudo	800	73	6	0	2	8	6	14	M
Pseudo	800	74	6	0	3	9	5	14	M
Pseudo	800	75	6	0	2	8	6	14	M
Pseudo	800	76	7	0	2	9	4	13	M
Pseudo	800	77	7	0	2	9	4	13	F
Pseudo	800	78	7	0	2	9	3	12	M
Pseudo	800	79	7	0	2	9	2	11	M
Pseudo	800	80	7	1	0	0	0	0	0
Pseudo	800	81	7	0	2	9	5	14	M
Pseudo	800	82	7	0	3	10	3	13	F
Pseudo	800	83	7	0	2	9	5	14	M
Pseudo	800	84	7	0	0	0	0	0	0
Pseudo	800	85	8	0	2	10	5	15	F
Pseudo	800	86	9	2	0	0	0	0	0
Pseudo	800	87	9	0	3	12	0	12	F
Pseudo	800	88	9	0	0	0	0	0	0
Pseudo	800	89	10	0	3	13	2	15	F
Pseudo	800	90	10	0	2	12	3	15	F
Pseudo	800	91	11	0	2	13	3	16	F
Pseudo	800	92	11	0	0	0	0	0	0
Pseudo	800	93	12	0	2	14	2	16	M
Pseudo	800	94	12	0	2	14	6	20	M
Pseudo	800	95	5	0	3	8	5	13	M
Pseudo	800	96	5	0	3	8	5	13	F
Pseudo	800	97	5	0	3	8	6	14	M
Pseudo	800	98	6	0	2	8	6	14	M
Pseudo	800	99	6	0	2	8	2	10	M
Pseudo	800	100	6	0	2	8	6	14	M
Pseudo	800	101	6	0	3	9	3	12	M
Pseudo	800	102	6	0	2	8	4	12	M
Pseudo	800	103	6	2	0	0	0	0	0
Pseudo	800	104	6	0	2	8	3	11	F
Pseudo	800	105	6	0	3	9	3	12	M
Pseudo	800	106	6	0	2	8	3	11	F
Pseudo	800	107	6	0	2	8	5	13	M
Pseudo	800	108	6	0	3	9	3	12	F
Pseudo	800	109	6	0	2	8	6	14	M
Pseudo	800	110	6	0	2	8	7	15	M
Pseudo	800	111	6	0	2	8	4	12	M
Pseudo	800	112	6	0	2	8	4	12	M
Pseudo	800	113	6	0	2	8	7	15	M
Pseudo	800	114	6	0	3	9	5	14	M
Pseudo	800	115	6	0	3	9	5	14	M
Pseudo	800	116	6	0	2	8	5	13	F
Pseudo	800	117	6	0	3	9	3	12	M
Pseudo	800	118	6	0	3	9	2	11	M
Pseudo	800	119	6	0	3	9	3	12	M
Pseudo	800	120	6	0	3	9	3	12	F
Pseudo	800	121	6	0	3	9	5	14	M
Pseudo	800	122	6	0	2	8	3	11	M
Pseudo	800	123	6	0	2	8	7	15	M
Pseudo	800	124	7	0	2	9	5	14	M
Pseudo	800	125	7	0	3	10	2	12	F
Pseudo	800	126	7	0	3	10	4	14	F
Pseudo	800	127	7	0	2	9	4	13	F
Pseudo	800	128	7	0	3	10	2	12	F
Pseudo	800	129	7	0	3	10	4	14	F
Pseudo	800	130	7	0	2	9	3	12	F
Pseudo	800	131	7	0	3	10	2	12	M
Pseudo	800	132	7	0	3	10	3	13	F
Pseudo	800	133	7	0	3	10	3	13	M
Pseudo	800	134	7	0	2	9	4	13	F
Pseudo	800	135	7	1	0	0	0	0	0
Pseudo	800	136	7	0	0	0	0	0	0
Pseudo	800	137	8	0	2	10	4	14	F
Pseudo	800	138	8	0	2	10	4	14	F
Pseudo	800	139	8	0	3	11	2	13	F
Pseudo	800	140	8	0	2	10	2	12	F
Pseudo	800	141	8	0	3	11	3	14	F
Pseudo	800	142	9	0	3	12	3	15	F
Pseudo	800	143	10	0	2	12	3	15	F
Sac	800	1	7	0	3	10	7	17	M
Sac	800	2	7	0	3	10	4	14	M
Sac	800	3	7	0	3	10	6	16	M
Sac	800	4	7	0	3	10	4	14	M
Sac	800	5	7	0	3	10	3	13	M
Sac	800	6	7	0	3	10	7	17	M
Sac	800	7	7	0	2	9	10	19	M
Sac	800	8	7	0	2	9	9	18	M
Sac	800	9	7	0	3	10	8	18	M
Sac	800	10	7	0	3	10	3	13	M
Sac	800	11	8	0	3	11	3	14	F
Sac	800	12	8	0	2	10	8	18	M
Sac	800	13	8	0	2	10	4	14	F
Sac	800	14	8	0	2	10	7	17	M
Sac	800	15	8	0	2	10	5	15	F
Sac	800	16	8	0	3	11	5	16	F
Sac	800	17	8	0	3	11	4	15	F
Sac	800	18	8	0	3	11	5	16	F
Sac	800	19	8	0	3	11	4	15	F
Sac	800	20	8	0	3	11	3	14	F
Sac	800	21	8	0	2	10	3	13	F
Sac	800	22	8	0	2	10	4	14	F
Sac	800	23	8	0	3	11	4	15	F
Sac	800	24	8	0	3	11	3	14	F
Sac	800	25	8	0	2	10	4	14	M
Sac	800	26	8	0	2	10	4	14	F
Sac	800	27	8	0	2	10	8	18	M
Sac	800	28	8	0	3	11	3	14	M
Sac	800	29	8	0	2	10	2	12	M
Sac	800	30	8	0	3	11	4	15	M
Sac	800	31	8	0	2	10	7	17	M
Sac	800	32	8	0	2	10	5	15	M
Sac	800	33	8	0	3	11	4	15	F
Sac	800	34	8	0	2	10	5	15	M
Sac	800	35	8	0	2	10	4	14	M
Sac	800	36	8	0	2	10	4	14	M
Sac	800	37	8	0	3	11	2	13	M
Sac	800	38	8	0	3	11	3	14	F
Sac	800	39	8	0	2	10	9	19	M
Sac	800	40	8	0	3	11	9	20	M
Sac	800	41	8	0	3	11	9	20	M
Sac	800	42	8	0	3	11	4	15	M
Sac	800	43	8	0	3	11	3	14	F
Sac	800	44	8	0	3	11	5	16	F
Sac	800	45	9	0	2	11	4	15	M
Sac	800	46	9	0	2	11	4	15	M
Sac	800	47	9	0	2	11	4	15	F
Sac	800	48	9	0	2	11	3	14	F
Sac	800	49	9	0	2	11	6	17	M
Sac	800	50	9	0	2	11	2	13	F
Sac	800	51	7	0	2	9	8	17	M
Sac	800	52	7	0	3	10	8	18	M
Sac	800	53	7	0	3	10	10	20	M
Sac	800	54	8	0	2	10	4	14	F
Sac	800	55	8	0	2	10	4	14	M
Sac	800	56	8	0	2	10	3	13	M
Sac	800	57	8	0	2	10	3	13	F
Sac	800	58	8	0	2	10	4	14	M
Sac	800	59	8	0	3	11	4	15	F
Sac	800	60	8	0	2	10	3	13	M
Sac	800	61	8	3	0	0	0	0	0
Sac	800	62	8	0	2	10	10	20	M
Sac	800	63	8	0	3	11	4	15	M
Sac	800	64	8	0	2	10	3	13	M
Sac	800	65	8	0	3	11	2	13	F
Sac	800	66	8	0	3	11	3	14	F
Sac	800	67	8	0	3	11	4	15	M
Sac	800	68	8	0	3	11	4	15	F
Sac	800	69	8	0	3	11	3	14	M
Sac	800	70	8	0	3	11	8	19	M
Sac	800	71	8	0	2	10	1	11	M
Sac	800	72	8	0	3	11	5	16	M
Sac	800	73	8	0	3	11	4	15	F
Sac	800	74	8	0	2	10	6	16	F
Sac	800	75	8	0	3	11	4	15	M
Sac	800	76	8	0	3	11	9	20	M
Sac	800	77	8	0	2	10	6	16	M
Sac	800	78	8	0	3	11	2	13	M
Sac	800	79	8	0	3	11	8	19	M
Sac	800	80	8	0	2	10	4	14	M
Sac	800	81	8	0	3	11	5	16	M
Sac	800	82	8	0	2	10	4	14	M
Sac	800	83	8	0	3	11	4	15	F
Sac	800	84	9	0	3	12	0	12	F
Sac	800	85	9	0	2	11	4	15	F
Sac	800	86	9	0	2	11	0	11	F
Sac	800	87	9	0	2	11	4	15	F
Sac	800	88	9	0	2	11	7	18	M
Sac	800	89	9	0	2	11	0	11	F
Sac	800	90	9	0	3	12	4	16	F
Sac	800	91	9	0	2	11	0	11	F
Sac	800	92	9	0	2	11	4	15	F
Sac	800	93	9	0	3	12	0	12	F
Sac	800	94	9	0	2	11	4	15	F
Sac	800	95	9	0	2	11	9	20	M
Sac	800	96	9	0	2	11	0	11	F
Sac	800	97	9	0	2	11	1	12	M
Sac	800	98	9	0	2	11	4	15	M
Sac	800	99	9	0	3	12	3	15	F
Sac	800	100	9	0	2	11	4	15	F
Sac	800	101	7	0	3	10	3	13	M
Sac	800	102	7	0	3	10	7	17	M
Sac	800	103	7	0	2	9	8	17	M
Sac	800	104	7	0	3	10	9	19	M
Sac	800	105	7	0	3	10	7	17	M
Sac	800	106	7	0	3	10	7	17	M
Sac	800	107	7	0	3	10	2	12	M
Sac	800	108	7	0	2	9	4	13	M
Sac	800	109	7	0	3	10	8	18	M
Sac	800	110	7	0	3	10	10	20	M
Sac	800	111	7	0	3	10	5	15	M
Sac	800	112	7	0	3	10	10	20	M
Sac	800	113	8	0	3	11	6	17	F
Sac	800	114	8	0	3	11	3	14	F
Sac	800	115	8	0	3	11	4	15	F
Sac	800	116	8	0	2	10	3	13	M
Sac	800	117	8	0	2	10	4	14	F
Sac	800	118	8	0	2	10	4	14	M
Sac	800	119	8	0	3	11	1	12	F
Sac	800	120	8	0	2	10	2	12	M
Sac	800	121	8	0	3	11	1	12	F
Sac	800	122	8	0	3	11	1	12	M
Sac	800	123	8	0	3	11	4	15	M
Sac	800	124	8	0	3	11	9	20	M
Sac	800	125	8	0	3	11	3	14	F
Sac	800	126	8	0	2	10	4	14	F
Sac	800	127	8	0	3	11	8	19	M
Sac	800	128	8	0	3	11	3	14	M
Sac	800	129	8	0	3	11	3	14	M
Sac	800	130	8	0	2	10	3	13	M
Sac	800	131	8	0	3	11	3	14	F
Sac	800	132	8	0	2	10	4	14	F
Sac	800	133	8	0	3	11	4	15	F
Sac	800	134	9	0	3	12	3	15	M
Sac	800	135	9	0	2	11	3	14	F
Sac	800	136	9	0	2	11	0	11	F
Sac	800	137	9	0	2	11	3	14	M
Sac	800	138	9	0	2	11	4	15	F
Sac	800	139	9	0	2	11	10	21	M
Sac	800	140	9	0	3	12	3	15	M
Sac	800	141	9	0	2	11	10	21	M
Sac	800	142	9	0	2	11	4	15	F
Sac	800	143	9	0	3	12	3	15	M
Sac	800	144	9	0	2	11	8	19	M
Sac	800	145	9	0	2	11	5	16	M
Sac	800	146	9	0	2	11	4	15	F
Sac	800	147	9	0	2	11	2	13	F
Sac	800	148	9	0	2	11	0	11	F
Sac	800	149	9	0	3	12	3	15	F
Sac	800	150	9	0	2	11	0	11	F
Tet	800	1	5	0	2	7	9	16	F
Tet	800	2	5	0	2	7	10	17	M
Tet	800	3	5	0	2	7	9	16	F
Tet	800	4	5	0	2	7	8	15	F
Tet	800	5	5	0	2	7	7	14	F
Tet	800	6	5	0	2	7	8	15	F
Tet	800	7	5	0	2	7	9	16	M
Tet	800	8	5	0	2	7	10	17	M
Tet	800	9	5	0	2	7	8	15	F
Tet	800	10	5	0	2	7	9	16	F
Tet	800	11	5	0	2	7	10	17	F
Tet	800	12	5	0	2	7	10	17	M
Tet	800	13	5	0	2	7	9	16	M
Tet	800	14	5	0	2	7	12	19	M
Tet	800	15	5	0	2	7	7	14	F
Tet	800	16	5	0	2	7	12	19	M
Tet	800	17	5	0	2	7	8	15	F
Tet	800	18	5	0	2	7	8	15	F
Tet	800	19	5	0	2	7	9	16	M
Tet	800	20	5	0	2	7	6	13	M
Tet	800	21	5	0	2	7	10	17	M
Tet	800	22	5	0	2	7	8	15	M
Tet	800	23	5	0	2	7	10	17	M
Tet	800	24	5	0	2	7	10	17	M
Tet	800	25	5	0	2	7	6	13	M
Tet	800	26	5	0	2	7	10	17	M
Tet	800	27	5	0	2	7	8	15	F
Tet	800	28	5	0	2	7	7	14	M
Tet	800	29	5	0	2	7	10	17	M
Tet	800	30	5	0	2	7	8	15	F
Tet	800	31	5	0	2	7	8	15	F
Tet	800	32	5	0	2	7	10	17	F
Tet	800	33	5	0	2	7	8	15	F
Tet	800	34	5	0	2	7	11	18	F
Tet	800	35	5	0	2	7	4	11	F
Tet	800	36	5	0	2	7	11	18	M
Tet	800	37	5	0	3	8	10	18	F
Tet	800	38	5	0	3	8	10	18	F
Tet	800	39	6	0	3	9	7	16	F
Tet	800	40	6	0	3	9	7	16	F
Tet	800	41	6	0	3	9	10	19	M
Tet	800	42	6	0	3	9	10	19	F
Tet	800	43	6	0	3	9	10	19	F
Tet	800	44	6	0	3	9	11	20	M
Tet	800	45	6	0	3	9	10	19	M
Tet	800	46	6	0	3	9	10	19	F
Tet	800	47	6	0	3	9	4	13	F
Tet	800	48	6	0	3	9	10	19	M
Tet	800	49	6	0	3	9	7	16	M
Tet	800	50	6	0	3	9	10	19	F
Tet	800	51	5	0	2	7	9	16	M
Tet	800	52	5	0	2	7	8	15	F
Tet	800	53	5	0	2	7	11	18	M
Tet	800	54	5	0	2	7	8	15	F
Tet	800	55	5	0	2	7	8	15	M
Tet	800	56	5	0	2	7	4	11	F
Tet	800	57	5	0	2	7	10	17	M
Tet	800	58	5	0	2	7	10	17	M
Tet	800	59	5	0	2	7	11	18	M
Tet	800	60	5	0	2	7	9	16	F
Tet	800	61	5	0	2	7	12	19	F
Tet	800	62	5	0	2	7	10	17	M
Tet	800	63	5	0	2	7	8	15	F
Tet	800	64	5	0	2	7	10	17	M
Tet	800	65	5	0	2	7	8	15	F
Tet	800	66	5	0	2	7	11	18	M
Tet	800	67	5	0	2	7	10	17	F
Tet	800	68	5	0	2	7	11	18	M
Tet	800	69	5	0	2	7	7	14	F
Tet	800	70	5	0	2	7	4	11	F
Tet	800	71	5	0	2	7	8	15	M
Tet	800	72	5	0	2	7	11	18	F
Tet	800	73	5	0	2	7	9	16	F
Tet	800	74	5	0	2	7	8	15	F
Tet	800	75	5	0	2	7	9	16	F
Tet	800	76	5	0	2	7	8	15	F
Tet	800	77	5	0	2	7	11	18	M
Tet	800	78	5	0	2	7	11	18	M
Tet	800	79	5	0	2	7	9	16	F
Tet	800	80	5	0	2	7	10	17	M
Tet	800	81	5	0	2	7	10	17	M
Tet	800	82	5	0	2	7	10	17	F
Tet	800	83	6	0	2	8	7	15	F
Tet	800	84	6	0	2	8	8	16	F
Tet	800	85	6	0	2	8	8	16	M
Tet	800	86	6	0	2	8	9	17	F
Tet	800	87	6	0	2	8	11	19	M
Tet	800	88	6	0	2	8	7	15	F
Tet	800	89	6	0	2	8	8	16	F
Tet	800	90	6	0	2	8	7	15	F
Tet	800	91	6	0	2	8	10	18	F
Tet	800	92	6	0	2	8	9	17	F
Tet	800	93	6	0	2	8	7	15	F
Tet	800	94	6	0	2	8	7	15	F
Tet	800	95	6	0	2	8	9	17	F
Tet	800	96	6	0	2	8	7	15	F
Tet	800	97	6	0	2	8	10	18	M
Tet	800	98	6	0	2	8	7	15	F
Tet	800	99	7	0	2	9	7	16	F
Tet	800	100	7	0	2	9	11	20	M
Tet	800	101	5	0	2	7	10	17	F
Tet	800	102	5	0	2	7	10	17	F
Tet	800	103	5	0	2	7	5	12	F
Tet	800	104	5	0	2	7	5	12	M
Tet	800	105	5	0	2	7	8	15	M
Tet	800	106	5	0	2	7	10	17	F
Tet	800	107	5	0	2	7	9	16	M
Tet	800	108	5	0	2	7	10	17	M
Tet	800	109	5	0	2	7	9	16	M
Tet	800	110	5	0	2	7	10	17	M
Tet	800	111	5	0	2	7	8	15	F
Tet	800	112	5	0	2	7	11	18	F
Tet	800	113	5	0	2	7	8	15	M
Tet	800	114	5	0	2	7	8	15	F
Tet	800	115	5	0	2	7	11	18	M
Tet	800	116	5	0	2	7	11	18	F
Tet	800	117	5	0	2	7	11	18	F
Tet	800	118	5	0	2	7	9	16	F
Tet	800	119	5	0	2	7	11	18	M
Tet	800	120	5	0	2	7	10	17	F
Tet	800	121	5	0	2	7	9	16	M
Tet	800	122	5	0	2	7	8	15	F
Tet	800	123	5	0	2	7	7	14	M
Tet	800	124	5	0	2	7	10	17	F
Tet	800	125	5	0	2	7	10	17	M
Tet	800	126	5	0	2	7	8	15	F
Tet	800	127	5	0	2	7	8	15	F
Tet	800	128	5	0	2	7	9	16	M
Tet	800	129	5	0	2	7	8	15	M
Tet	800	130	5	0	2	7	10	17	F
Tet	800	131	5	0	2	7	12	19	F
Tet	800	132	5	0	2	7	11	18	M
Tet	800	133	5	0	2	7	10	17	M
Tet	800	134	5	0	2	7	8	15	F
Tet	800	135	5	0	2	7	9	16	M
Tet	800	136	5	0	2	7	11	18	M
Tet	800	137	5	2	0	0	0	0	0
Tet	800	138	6	0	2	8	7	15	F
Tet	800	139	6	0	2	8	6	14	F
Tet	800	140	6	0	2	8	10	18	F
Tet	800	141	6	0	2	8	7	15	F
Tet	800	142	6	0	2	8	7	15	F
Tet	800	143	6	0	2	8	7	15	M
Tet	800	144	6	0	2	8	10	18	F
Tet	800	145	6	0	2	8	10	18	F
Tet	800	146	6	0	2	8	7	15	F
Tet	800	147	6	0	2	8	7	15	F
Tet	800	148	6	0	2	8	10	18	F
Tet	800	149	6	0	2	8	10	18	F
Tet	800	150	6	0	2	8	7	15	F
Serratia	800	1	35	0	2	40	3	43	M
Serratia	800	2	38	1	0	0	0	0	0
Serratia	800	3	49	1	0	0	0	0	0
Serratia	800	4	46	0	3	49	1	50	M
Bacillus	800	1	34	0	2	36	2	38	M
Bacillus	800	2	34	0	2	36	2	38	M
Asaia	800	1	8	0	3	11	7	18	M
Asaia	800	2	11	1	0	0	0	0	0
Asaia	800	3	11	0	2	13	5	18	M
Asaia	800	4	12	0	2	14	4	18	F
Asaia	800	5	13	0	2	15	3	18	M
Asaia	800	6	13	0	2	15	5	20	M
Asaia	800	7	16	0	2	18	4	22	F
Asaia	800	8	16	0	2	18	4	22	F
Asaia	800	9	9	0	2	11	7	18	M
Asaia	800	10	9	0	2	11	7	18	F
Asaia	800	11	9	0	2	11	7	18	M
Asaia	800	12	9	0	2	11	7	18	M
Asaia	800	13	9	0	2	11	7	18	M
Asaia	800	14	9	0	2	11	7	18	M
Asaia	800	15	10	0	2	12	6	18	M
Asaia	800	16	11	1	0	0	0	0	0
Asaia	800	17	10	0	2	12	6	18	F
Asaia	800	18	11	0	2	13	5	18	M
Asaia	800	19	12	0	2	14	4	18	M
Asaia	800	20	9	0	2	11	7	18	M
Asaia	800	21	9	0	2	11	3	14	F
Asaia	800	22	9	0	2	11	7	18	F
Asaia	800	23	9	0	2	11	7	18	M
Asaia	800	24	10	0	3	13	6	19	F
Asaia	800	25	10	0	2	12	6	18	M
Asaia	800	26	13	0	2	15	3	18	F
Asaia	800	27	14	0	2	16	4	20	F
Asaia	800	28	9	0	2	11	7	18	M
Asaia	800	29	9	0	2	11	7	18	M
Asaia	800	30	9	0	2	11	7	18	M
Asaia	800	31	9	0	2	11	7	18	M
Asaia	800	32	10	0	2	12	6	18	M
Asaia	800	33	11	1	0	0	0	0	0
Asaia	800	34	10	0	2	12	6	18	F
Asaia	800	35	11	0	2	13	5	18	M
Asaia	800	36	12	0	2	14	4	18	M
Asaia	800	37	9	0	2	11	7	18	M
Asaia	800	38	9	0	2	11	3	14	F
Asaia	800	39	9	0	2	11	7	18	F
Asaia	800	40	9	0	2	11	7	18	M
Asaia	800	41	10	0	3	13	6	19	F
Asaia	800	42	10	0	2	12	6	18	M
Asaia	800	43	13	0	2	15	3	18	F
Asaia	800	44	14	0	2	16	4	20	F
S.aureus	800	1	15	0	3	18	2	20	M
S.aureus	800	2	16	0	3	19	1	20	M
S.aureus	800	3	17	0	3	20	3	23	M
S.aureus	800	4	17	1	0	0		0	0
S.aureus	800	5	17	1	0	0		0	0
S.aureus	800	6	20	2	0	0		0	0
S.aureus	800	7	20	0	3	23	1	24	F
S.aureus	800	8	22	0	3	25	2	27	F
S.aureus	800	9	49	1	0	0		0	0
S.aureus	800	10	14	0	2	16	2	18	M
S.aureus	800	11	15	3	0	0		0	0
S.aureus	800	12	17	0	3	20	6	26	F
S.aureus	800	13	18	1	0	0		0	0
S.aureus	800	14	22	2	0	0		0	0
S.aureus	800	15	22	0	2	24	1	25	M
S.aureus	800	16	22	0	2	24	1	25	F
S.aureus	800	17	25	0	2	27	1	28	M
S.aureus	800	18	25	1	0	0		0	0
S.aureus	800	19	29	1	0	0		0	0
S.aureus	800	20	29	2	0	0		0	0
S.aureus	800	21	32	1	0	0		0	0
S.aureus	800	22	44	0	2	46	3	49	M
S.aureus	800	23	11	0	2	13	5	18	M
S.aureus	800	24	14	0	2	16	3	19	M
S.aureus	800	25	16	3	0	0		0	0
S.aureus	800	26	25	1	0	0		0	0
S.aureus	800	27	25	1	0	0		0	0
S.aureus	800	28	25	1	0	0		0	0
S.aureus	800	29	29	0	3	32	1	33	M
S.aureus	800	30	30	0	2	32	1	33	M
S.aureus	800	31	35	0	2	37	3	40	F
S.aureus	800	32	39	1	0	0		0	0
S.aureus	800	33	49	0	0	0		0	0
Ochrobactrum	800	1	15	0	2	17	2	19	M
Ochrobactrum	800	2	19	0	2	21	3	24	F
Ochrobactrum	800	3	28	0	2	30	3	33	M
Ochrobactrum	800	4	28	0	2	30	3	33	M
Ochrobactrum	800	5	39	1	0	0	0	0	0
Ochrobactrum	800	6	48	0	2	50	2	52	M
Ochrobactrum	800	7	23	0	2	25	2	27	M
Ochrobactrum	800	8	25	0	2	27	6	33	M
Ochrobactrum	800	9	29	0	2	31	1	32	M
A.platensis	150	1	35	0	2	37	3	40	M
A.platensis	150	2	26	0	2	28	4	32	M
A.platensis	150	3	32	0	2	34	5	39	M
A.platensis	150	4	41	0	2	43	4	47	F
A.platensis	150	5	42	0	2	44	4	48	M
A.platensis	150	6	32	0	2	34	4	38	M
A.platensis	150	7	34	0	2	36	3	39	M
A.platensis	150	8	34	0	2	36	4	40	M
A.platensis	150	9	39	0	2	41	3	44	M
A.platensis	150	10	39	0	2	41	4	45	M
A.platensis	150	11	33	0	2	35	2	37	M
A.platensis	150	12	34	0	2	36	4	40	M
A.platensis	150	13	36	0	2	38	3	41	M
A.platensis	150	14	37	0	2	39	4	43	M
A.platensis	150	15	39	1	0	0	0	0	0
A.platensis	150	16	39	0	2	41	4	45	F
A.platensis	150	17	39	0	2	41	3	44	F
A.platensis	150	18	41	0	2	43	4	47	F
A.platensis	150	19	42	0	2	44	10	54	F
A.platensis	150	20	43	0	2	45	7	52	F
A.platensis	150	21	20	0	2	22	3	25	M
A.platensis	150	22	33	0	2	35	4	39	F
A.platensis	150	23	46	1	0	0	0	0	0
A.platensis	150	24	25	0	2	27	6	33	M
A.platensis	150	25	33	0	2	35	6	41	M
A.platensis	150	26	33	0	2	35	6	41	F
A.platensis	150	27	33	0	2	35	6	41	M
A.platensis	150	28	42	0	2	44	3	47	M
A.platensis	150	29	32	0	2	34	2	36	M
A.platensis	150	30	33	0	2	35	4	39	F
Clhorella sp.	150	1	56	0	2	58	3	61	M
Clhorella sp.	150	2	56	0	2	58	3	61	M
Clhorella sp.	150	3	62	0	2	64	3	67	M
Clhorella sp.	150	4	45	0	2	47	4	51	M
Clhorella sp.	150	5	67	0	2	69	4	73	F
Clhorella sp.	150	6	69	0	2	71	3	74	M
Clhorella sp.	150	7	69	0	2	71	3	74	M
Clhorella sp.	150	8	70	0	2	72	4	76	F
Clhorella sp.	150	9	71	2	0	0	0	0	0
Clhorella sp.	150	10	73	0	2	75	4	79	M
Clhorella sp.	150	11	47	0	2	49	3	52	M
Clhorella sp.	150	12	49	0	2	51	4	55	M
Clhorella sp.	150	13	56	0	2	58	4	62	M
Clhorella sp.	150	14	62	0	2	64	3	67	M
Clhorella sp.	150	15	70	0	2	72	4	76	M
Clhorella sp.	150	16	74	0	2	76	5	81	M
Clhorella sp.	150	17	78	0	2	80	3	83	M
Clhorella sp.	150	18	45	0	2	47	3	50	M
Clhorella sp.	150	19	48	0	2	50	3	53	M
Clhorella sp.	150	20	49	0	2	51	3	54	M
Clhorella sp.	150	21	51	0	2	53	3	56	F
Clhorella sp.	150	22	51	0	2	53	4	57	M
Clhorella sp.	150	23	55	0	2	57	5	62	M
Clhorella sp.	150	24	60	0	2	62	3	65	F
Clhorella sp.	150	25	60	0	2	62	4	66	M
Clhorella sp.	150	26	71	0	2	73	3	76	M
Clhorella sp.	150	27	78	0	2	80	5	85	F
Clhorella sp.	150	28	81	0	2	83	3	86	F
